# Supplementary material
Source: PubMed Central journal article supplement (PMC3123099)
Supplement: supp_M111.230292_Supplemental_Data_final_0511_2011.pdf [file supp_M111.230292_Supplemental_Data_final_0511_2011.pdf]

## Supplemental Data

### Active Site-labeled Prothrombin Inhibits Prothrombinase *In Vitro* and Thrombosis *In Vivo*

Heather K. Kroh, Peter Panizzi, Svetlana Tchaikovski, T. Regan Baird, Nancy Chang, Sriram Krishnaswamy, Guido Tans, Jan Rosing, Bruce Furie, Barbara C. Furie, and Paul E. Bock

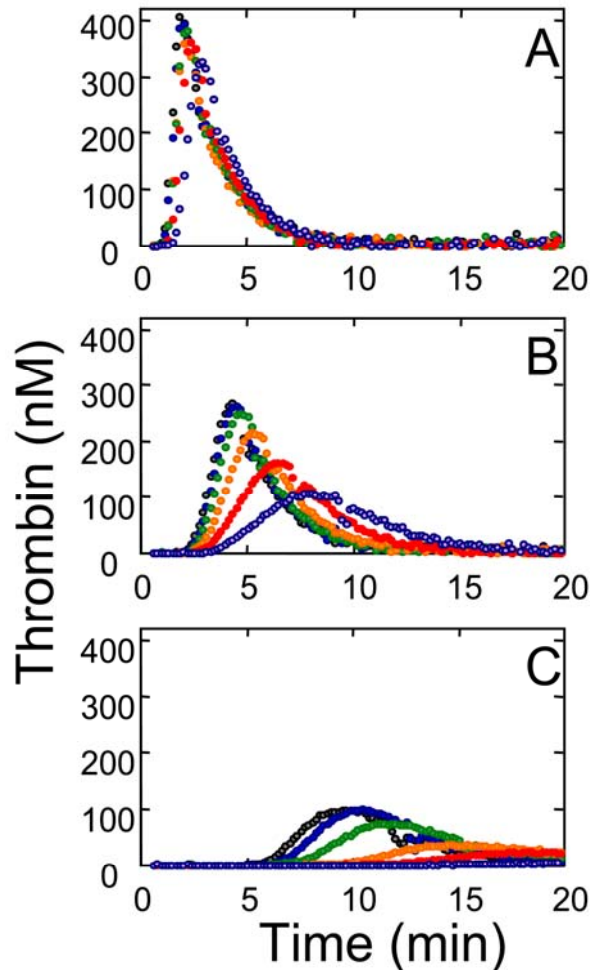

**FIGURE 1S. Inhibition of thrombin generation in platelet-poor human plasma as a function of FPR-ProT at three different TF concentrations.** Thrombin generation curves were measured in a total volume of 125  $\mu$ l containing 80  $\mu$ l platelet-poor human plasma by CAT as described under “Experimental Procedures”. Thrombin generation was initiated by 40 pM TF (A), 7 pM TF (B) or 1.75 pM TF (C) in the presence of 30  $\mu$ M PSPCPE vesicles, 40  $\mu$ g/ml corn trypsin inhibitor, 16 mM  $\text{CaCl}_2$ , 0.34 mM fluorogenic thrombin substrate, and varying concentrations of FPR-ProT ( $\mu$ M): 0 (gray), 0.2 (blue), 0.4 (green), 0.6 (orange), 0.8 (red) and 1.0 (violet). All concentrations are final concentrations in the reaction mixtures.

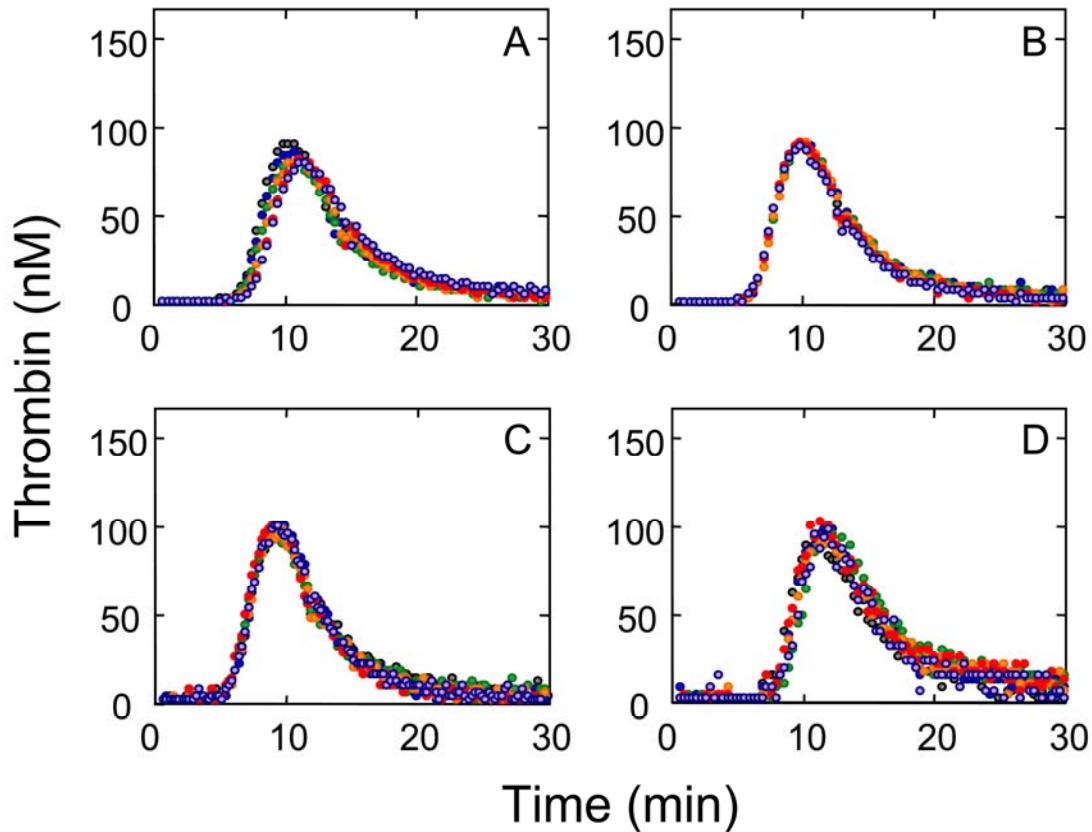

**FIGURE 2S. Low TF-initiated thrombin generation in platelet-poor human plasma at varying concentrations of F1, F1.2, FPR-Pre 1, and FPR-thrombin.** Thrombin generation curves were measured in a total volume of 125  $\mu$ l containing 80  $\mu$ l platelet-poor human plasma by CAT as described under “Experimental Procedures”. Final concentrations were: 1.75 pM TF, 30  $\mu$ M PSCPE vesicles, 40  $\mu$ g/ml corn trypsin inhibitor, 16 mM added  $\text{CaCl}_2$ , 0.34 mM substrate and 0 (*gray*), 0.2 (*blue*), 0.4 (*green*), 0.6 (*orange*), 0.8 (*red*) or 1.0 (*violet*)  $\mu$ M F1 (*A*), F1.2 (*B*), FPR-Pre 1 (*C*) or FPR-thrombin (*D*).

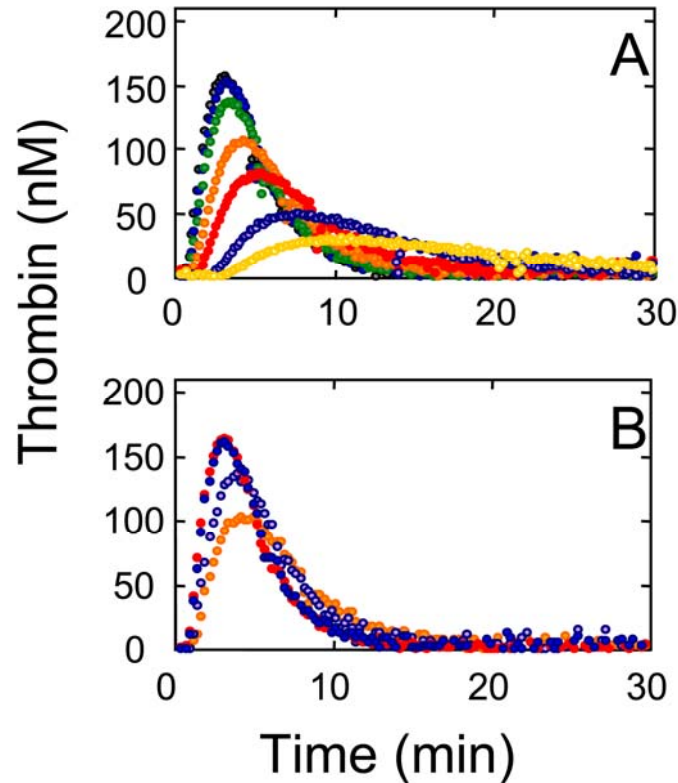

**FIGURE 3S. Effect of FPR-ProT, F1, F1.2, and FPR-Pre 1 on factor Xa-initiated thrombin generation in platelet-poor human plasma.** *A.* Thrombin generation curves were measured in a total volume of 125  $\mu$ l containing 80  $\mu$ l platelet-poor human plasma by CAT as described under “Experimental Procedures”. Thrombin generation was initiated by addition of 0.7 nM human factor Xa in the presence of 30  $\mu$ M PSPCPE vesicles, 40  $\mu$ g/ml corn trypsin inhibitor, 16 mM CaCl<sub>2</sub>, 0.34 mM substrate and 0 (*gray*), 0.2 (*blue*), 0.4 (*green*), 0.6 (*orange*), 0.8 (*red*), 1 (*violet*) or 1.2 (*yellow*)  $\mu$ M FPR-ProT. *B.* Thrombin generation in platelet-poor human plasma determined as in *A*, but with 1.2  $\mu$ M of the following ProT derivatives: none (*red*); F1 (*orange*); F1.2 (*violet*); FPR-Pre 1 (*blue*). All concentrations are final concentrations in the reaction mixtures.

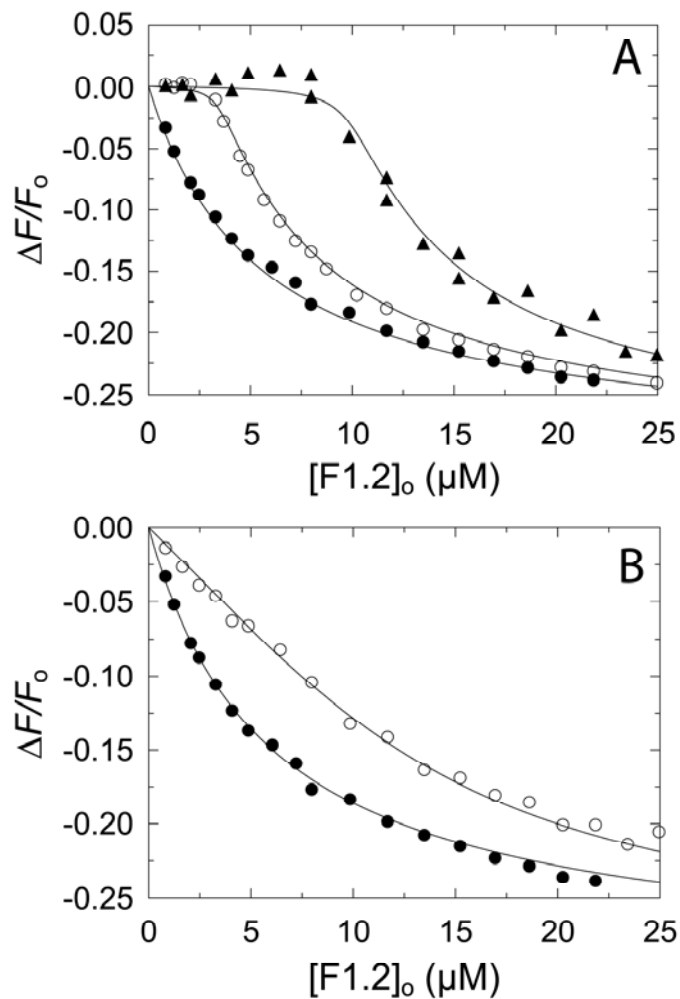

**FIGURE 4S. Competitive equilibrium binding of F1.2 to  $[6F]FPR$ -thrombin and native Pre 2 or FPR-Pre 2.** The fractional change in fluorescence ( $\Delta F/F_0$ ) of 103 nM  $[6F]FPR$ -thrombin as a function of total F1.2 concentration ( $[F1.2]_0$ ). *A.* in the absence (●) and presence of 3.5 (○) or 10 (▲)  $\mu\text{M}$  native Pre 2. *B.* as in *A* in the absence (●) or presence (○) of 10  $\mu\text{M}$  FPR-Pre 2. The *lines* represent the simultaneous fits by the cubic competitive binding equation, with  $K_D$  for F1.2 binding to  $[6F]FPR$ -thrombin in *A* of  $5.5 \pm 0.5 \mu\text{M}$  and in *B* of  $5.8 \pm 0.5 \mu\text{M}$ , and  $K_D$  for F1.2 binding to native Pre 2 in *A* of  $0.04 \pm 0.03 \mu\text{M}$ , and for F1.2 binding to FPR-Pre 2 in *B* of  $3.6 \pm 0.6 \mu\text{M}$ . The stoichiometric factor was fixed at 1. Titrations were performed as described in “Experimental Procedures.”

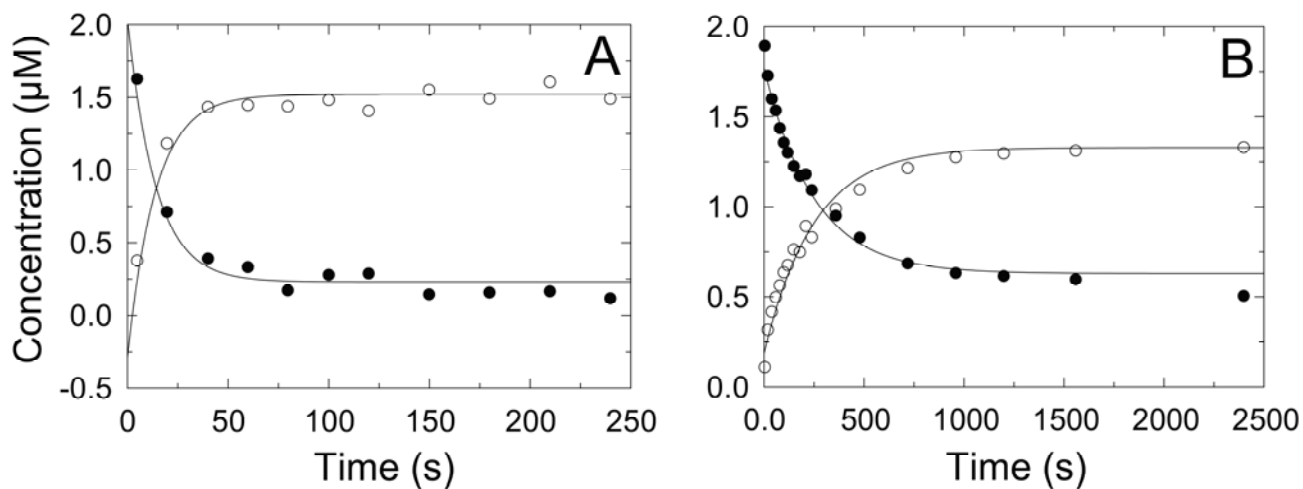

**FIGURE 5S. Time-courses of cleavage of native Pre 2 or FPR-Pre 2 in the presence of F1.2 by prothrombinase.** Concentration of Pre 2 (A) or FPR-Pre 2 (B) disappearance (●) and appearance of the reaction product, the thrombin B-chain (○). Reactions were performed at 37 °C with 2 µM Pre 2 or FPR-Pre 2 in the presence of 2 µM F1.2, 0.7 nM FXa, 50 nM FVa, 50 µM lipid vesicles (PSPCPE), and 60 µM DAPA. The *lines* represent the fits by single exponentials for both substrate depletion and product formation, with the parameters given in “Results”. Reactions were performed and analyzed by SDS-gel electrophoresis and quantitative densitometry as described in “Experimental Procedures”.

Native Pre 2:

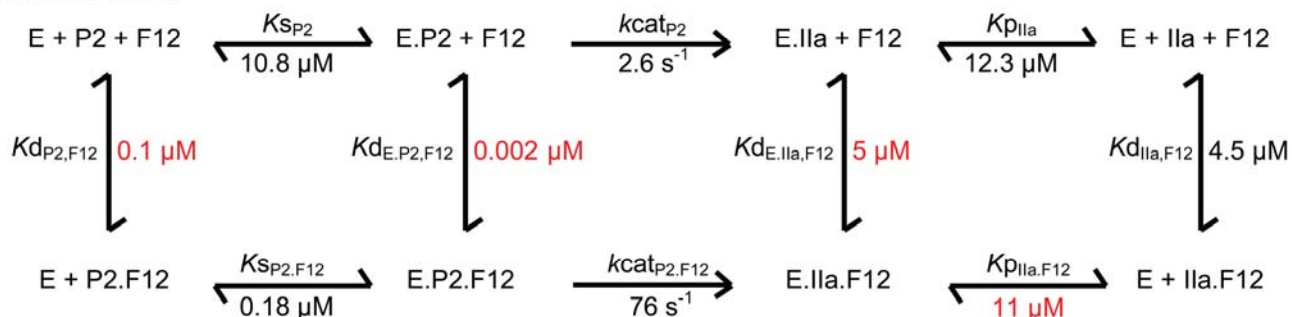

FPR-Pre 2:

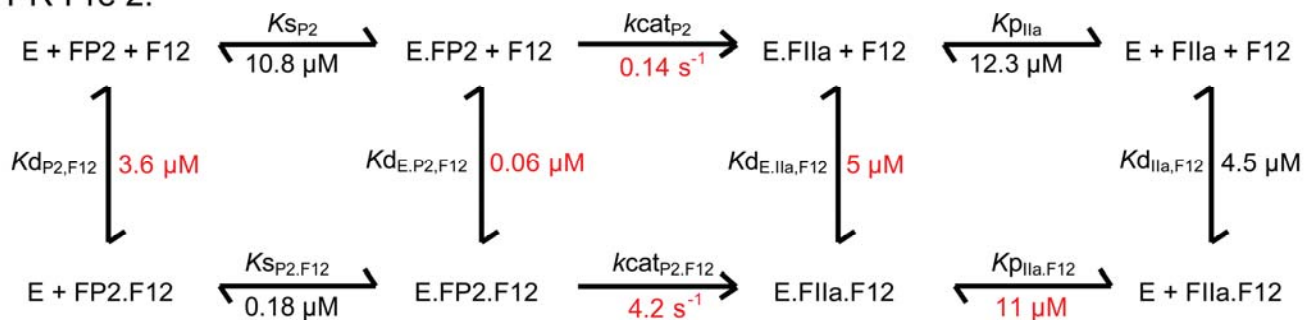

Scheme 1S

**SCHEME 1S. Pathways of native Pre 2 and FPR-Pre 2 activation in the absence and presence of F1.2.** Values in *black* are those of Kamath and Krishnaswamy (Ref. 59), and values in *red* are those supplied by the authors. Reprinted in modified form with permission. © 2008 The American Society for Biochemistry and Molecular Biology. All rights reserved.

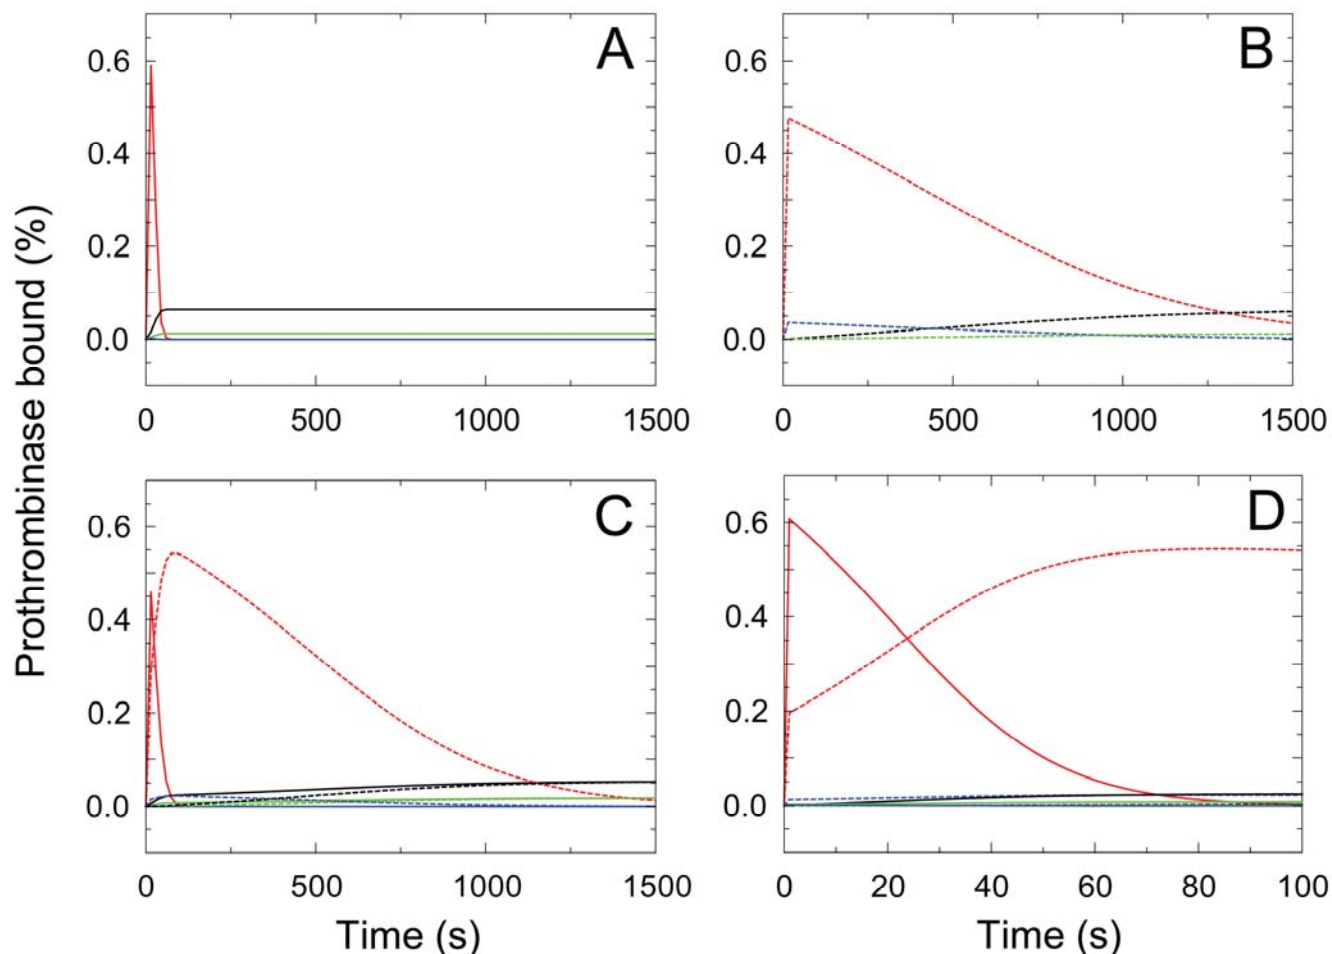

**FIGURE 6S. Time-course simulations of the mechanism in Scheme 1S for reactions of Pre 2 and FPR-Pre 2 with 0.7 nM prothrombinase.** *A.* Simulated time-courses for equimolar mixtures (1  $\mu\text{M}$ ) of native Pre 2 and F1.2, *B.* FPR-Pre 2 and F1.2, or *C.* 1  $\mu\text{M}$  each of Pre 2 and FPR-Pre 2 with 2  $\mu\text{M}$  F1.2. An expanded view of the initial 100 s of *C* is shown in *D*. Formation and disappearance of enzyme-bound complexes are represented as *solid lines* for species derived from native Pre 2 (Pre 2, *blue*; Pre 2·F1.2, *red*; thrombin, *black*; thrombin·F1.2, *green*), and as *dotted lines* for species derived from FPR-Pre 2 (FPR-Pre 2, *blue*; FPR-Pre 2·F1.2, *red*; FPR-thrombin, *black*; FPR-thrombin·F1.2, *green*). Simulations were done with KinTek Explorer (Refs. 64, 65), with bimolecular on-rate constants fixed at  $10^9 \text{ M}^{-1} \text{ s}^{-1}$  and off-rate constants to give the rapid-equilibrium dissociation constants shown in Scheme 1S.

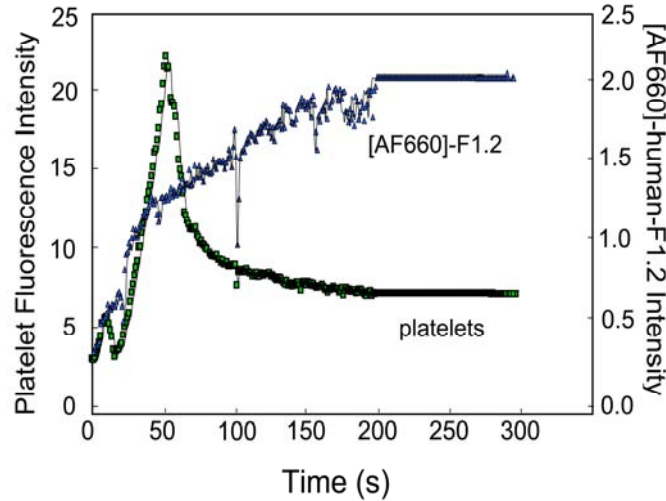

**FIGURE 7S. Accumulation of platelets and [AF660]-F1.2 following laser-induced injury.** Platelets (*green squares*) and [AF660]-F1.2 (*blue triangles*) were monitored for 5 min following laser injury. Notice platelet accumulation follows the reported triphasic pattern and is unaffected by the presence of [AF660]-F1.2.

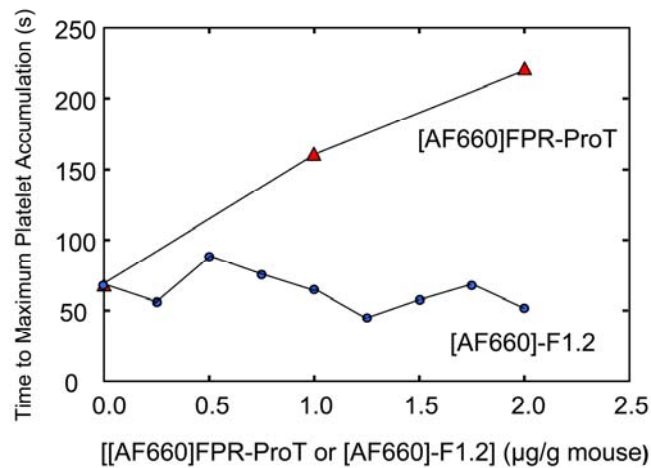

**FIGURE 8S. Time to reach maximum platelet deposition following laser-induced injury in the presence of [AF660]FPR-ProT or F1.2.** [AF660]-F1.2 or [AF660]FPR-ProT was titrated into animals prior to laser injury. Median time to achieve maximal platelet signal at each concentration of F1.2 (*blue circles*) and [AF660]FRP-ProT (*red triangles*). Notice the time to peak platelet accumulation increases with the dose of [AF660]FPR-ProT, but is minimally affected by increasing dosage of the Gla domain-containing F1.2.
